# Supplementary material for: Seasonal and Spatial Variability in the Bacterial Diversity in Haizhou Bay in the Southern Yellow China Sea
Source: MDPI journal article supplement (doi:10.3390/d15101051), 2023-09-29
Supplement: s1 [file s1]

Table S5. Taxonomic information of keystone network taxa.

|     | Module<br>hub                                                       | Phylum-Class-Family/Genus                                                                                                                                                                                                                                                                                                  | Connector                             | Phylum-Class                                                                                                                                                                                        |
|-----|---------------------------------------------------------------------|----------------------------------------------------------------------------------------------------------------------------------------------------------------------------------------------------------------------------------------------------------------------------------------------------------------------------|---------------------------------------|-----------------------------------------------------------------------------------------------------------------------------------------------------------------------------------------------------|
| Mar | OTU1382<br>OTU365<br>OTU12663<br>OTU193                             | Acidobacteria;Acidobacteriia;Granulicella<br>Bacteroidetes;Bacteroidia;Muribaculaceae<br>Firmicutes;Clostridia;Clostridium<br>Bacteroidetes;Flavobacteriia;NS7 marine group                                                                                                                                                |                                       |                                                                                                                                                                                                     |
| May | OTU987<br>OTU152<br>OTU195<br>OTU2199<br>OTU7460<br>OTU831<br>OTU89 | Actinobacteria;Actinomycetia;Actinomyces dentalis<br>Chloroflexi;Ktedonobacteria;Lachnospiraceae<br>Bacteroidetes;Flavobacteriia;Formosa<br>Proteobacteria;Alphaproteobacteria<br>Firmicutes;Clostridi;Acetobacteraceae<br>Cyanobacteria;Chroobacteria;Cyanobacteriales<br>Proteobacteria;Alphaproteobacteria;OCS116_clade | OTU339<br>OTU596<br>OTU667<br>OTU2083 | Actinobacteria;Rubrobacteria;Gaiellales<br>Proteobacteria;Gammaproteobacteria;Acidibacter<br>Proteobacteria;Alphaproteobacteria;Xanthobacteraceae<br>Proteobacteria;Gammaproteobacteria;Pseudomonas |
| Aug | OTU90                                                               | Proteobacteria;Gammaproteobacteria;OM182_clade                                                                                                                                                                                                                                                                             |                                       |                                                                                                                                                                                                     |
