# Supplementary material for: Seasonal and Spatial Variability in the Bacterial Diversity in Haizhou Bay in the Southern Yellow China Sea
Source: MDPI journal article supplement (doi:10.3390/d15101051), 2023-09-29
Supplement: s1 [file s1]

Table S1.

| Year | Month | Times | area (km <sup>2</sup> ) | Species                                                                                                             |
|------|-------|-------|-------------------------|---------------------------------------------------------------------------------------------------------------------|
| 2004 | 5、9   | 2     | 100                     | <i>Noctiluca scintillans</i> , <i>Genicularia polyphylla</i>                                                        |
| 2005 | 9、10  | 4     | 1275                    | <i>Skeletonema costatum</i> , <i>Gymnodinium catenatum</i>                                                          |
| 2006 | 10    | 1     | 600                     | <i>Trichocera brevis</i> , <i>Gymnodinium catenatum</i>                                                             |
| 2007 | 5、7   | 3     | 582                     | <i>Heterosigma akashiwo</i> , <i>Thalassiosira rotula</i> , <i>Chattonella marina</i>                               |
| 2008 | 5     | 1     | 70                      | <i>Heterosigma akashiwo</i> , <i>Amphidinium carterae</i>                                                           |
| 2009 | 4、6、7 | 3     | 270                     | <i>karenia mikimotoi</i>                                                                                            |
| 2010 | 4、7   | 2     | 220                     | <i>Gymnodinium catenatum</i>                                                                                        |
| 2011 | 9     | 1     | 200                     | <i>Skeletonema costatum</i>                                                                                         |
| 2012 | 6、7   | 2     | 350                     | <i>Skeletonema costatum</i>                                                                                         |
| 2013 | 5     | 1     | 450                     | <i>Heterosigma akashiwo</i>                                                                                         |
| 2017 | 5、6   | 3     | >100                    | <i>Skeletonema costatum</i> , <i>Gymnodinium catenatum</i> , <i>Karenia mikimotoi</i> , <i>Heterosigma akashiwo</i> |
