# Supplementary material for: Seasonal and Spatial Variability in the Bacterial Diversity in Haizhou Bay in the Southern Yellow China Sea
Source: MDPI journal article supplement (doi:10.3390/d15101051), 2023-09-29
Supplement: s1 [file s1]

| Month | Species                                                                                           |
|-------|---------------------------------------------------------------------------------------------------|
| 3     | <i>Noctiluca scintillans</i>                                                                      |
| 4     | <i>Prorocentrum</i> , <i>Haptophyta</i> , <i>Karlodinium veneficum</i> .                          |
| 5     | <i>Heterosigma akashiwo</i> , <i>Karlodinium veneficum</i> , <i>Skeletonema costatum</i> , diatom |
| 6     | <i>Enteromorpha prolifera</i> , diatom                                                            |
| 8     | <i>Skeletonema costatum</i> , <i>Gymnodinium aeruginosum</i> Stein                                |
